# Supplementary material for: Research and Deduction of Car-to-TW Vehicle AEB Test Scenarios Based on Improved Clustering Methods
Source: Hindawi journal article supplement (doi:10.1155/2023/2708201), 2023-10-13
Supplement: f1 [file 2708201.f1.docx]

# Appendix A

Table A1: Single-factor fuzzy evaluation table for the importance of variables.

|  | *perception layer* | *decision making layer* | *execution layer* |
| --- | --- | --- | --- |
| *condition of TW* | | | |
| *Very important* | 0.86 | 0.29 | 0.29 |
| *Important* | 0.14 | 0.71 | 0.29 |
| *Fairly important* | 0 | 0 | 0.14 |
| *Least important* | 0 | 0 | 0.29 |
| *condition of car* | | | |
| *Very important* | 0.43 | 0.57 | 0.43 |
| *Important* | 0.14 | 0.29 | 0.43 |
| *Fairly important* | 0.14 | 0 | 0.14 |
| *Least important* | 0.29 | 0.14 | 0 |
| *condition of road* | | | |
| *Very important* | 0.29 | 0.14 | 0.29 |
| *Important* | 0.43 | 0.57 | 0.29 |
| *Fairly important* | 0.29 | 0.29 | 0.43 |
| *Least important* | 0 | 0 | 0 |
| *condition of environment* | | | |
| *Very important* | 0.71 | 0.29 | 0.29 |
| *Important* | 0.29 | 0.57 | 0.29 |
| *Fairly important* | 0 | 0 | 0.14 |
| *Least important* | 0 | 0.14 | 0.29 |

Figure A1: Scenario No. 1.

Figure A2: Scenario No. 2.

**Figure A3 Scenario No. 3**

**Figure A4 Scenario No. 4**

**Figure A5 Scenario No. 5**

**Figure A6 Scenario No. 6**
